# Supplementary material for: Telephone-based Intervention Improves Quality of Life Among Family Caregivers of Persons with Dementia in Malaysia: The Mediating Role of Caregiver Burden
Source: Research Square preprint supplement (doi:10.21203/rs.3.rs-7314107/v1), 2025-09-03
Supplement: Supplementary file 2 [file 25465ee43eed83dd9f42948f.docx]

**Table 1: Comparative analysis on background characteristics between family caregivers of PWD who were dropped-out and remained in the study**

|  | **Drop Out (n=16)** | **Remain in Study (n=105)** | **Total**  **(n=121)** | ***p* value** |
| --- | --- | --- | --- | --- |
|  | n (%) | n (%) | n (%) |
| **Socio-economic Information** | | | | |
| **Caregivers’ Gender (%)** |  |  |  | 0.421 |
| Male | 4 (25.0) | 33 (31.4) | 37 (30.6) |
| Female | 12 (75.0) | 72 (68.6) | 84 (69.4) |
| **Age, mean±SD** | 50.00 ± 12.73 | 51.86 ± 12.70 | 51.61 ± 12.67 | 0.587 |
| **Religion (%)** |  |  |  | 0.256 |
| Islam | 11 (68.8) | 70 (66.7) | 81 (66.9) |
| Buddhism | 1 (6.3) | 22 (21.0) | 23 (19.0) |
| Hinduism | 3 (18.8) | 7 (6.7) | 10 (8.3) |
| Others (Christian, Sikh, Atheist) | 1 (6.3) | 6 (5.7) | 7 (5.8) |
| **Religion (%)** |  |  |  |  |
| Muslim | 11 (68.8) | 70 (66.7) | 81 (66.9) | 0.557 |
| Non-Muslim | 5 (31.3) | 35 (33.3) | 40 (33.1) |  |
| **Education level (%)*** |  |  |  | 0.100 |
| Primary | 0 (0.0) | 16 (15.2) | 16 (13.2) |
| Secondary | 5 (31.3) | 43 (41.0) | 48 (39.7) |
| Tertiary | 11 (68.8) | 46 (43.8) | 57 (47.1) |
| **Education level (%)**** |  |  |  |  |
| Primary or Secondary | 5 (31.3) | 59 (56.2) | 64 (52.9) | 0.055 |
| Tertiary | 11 (68.8) | 46 (43.8) | 57 (47.1) |  |
| **Marital status (%)*** |  |  |  | 0.251 |
| Married | 10 (62.5) | 79 (75.2) | 89 (73.6) |
| Unmarried | 3 (18.8) | 19 (18.1) | 22 (18.2) |
| Others (Divorced, Widowed) | 3 (18.8) | 7 (6.7) | 10 (8.3) |
| **Marrital Status (%)**** |  |  |  |  |
| Married | 10 (62.5) | 79 (75.2) | 89 (73.6) | 0.216 |
| Single | 6 (37.5) | 26 (24.8) | 32 (26.4) |  |
| **Occupation (%)*** |  |  |  |  |
| Employed (Government, Non-government) | 9 (56.3) | 35 (33.3) | 44 (36.4) | 0.207 |
| Self-employed | 2 (12.5) | 20 (19.0) | 22 (18.2) |
| Others (Homemaker, Unemployed, Retired) | 5 (31.3) | 50 (47.6) | 55 (45.5) |
| **Occupation (%)**** |  |  |  |  |
| Employed | 11 (68.8) | 55 (52.4) | 66 (54.5) | 0.170 |
| Unemployed | 5 (31.3) | 50 (47.6) | 55 (45.5) |  |
| **Household income (%)*** |  |  |  |  |
| B40 (RM4580 and below) | 8 (50.0) | 60 (57.1) | 68 (56.2) | 0.031 |
| M40 (RM4581-RM10959) | 4 (25.0) | 39 (37.1) | 43 (35.5) |
| T20 (RM10960 and above) | 4 (25.0) | 6 (5.7) | 10 (8.3) |
| **Household income Median** ± **SD**** | 4750 ± 17491.5 | 4000 ± 4681.9 | 4000 ± 7886.8 | 0.231 |
| **Health problem (%)** |  |  |  |  |
| Yes | 6 (37.5) | 58 (55.2) | 64 (52.9) | 0.146 |
| No | 10 (62.5) | 47 (44.8) | 57 (47.1) |  |
| **Smoker (%)** |  |  |  |  |
| Yes | 2 (12.5) | 9 (8.6) | 11 (9.1) | 0.443 |
| No | 14 (87.5) | 96 (91.4) | 110 (90.9) |  |
| **Social Support, mean±SD** | 62.25 ± 20.15 | 58.79 ± 16.68 | 59.25 ± 17.12 | 0.454 |
| Family support | 22.44 ± 6.24 | 21.22 ± 6.39 | 21.38 ± 6.35 | 0.477 |
| Friends support | 17.31 ± 8.99 | 15.95 ± 7.05 | 16.13 ± 7.31 | 0.490 |
| Significant others support | 22.50 ± 7.61 | 21.62 ± 6.33 | 21.74 ± 6.48 | 0.615 |
| **Burden, mean±SD** | 39.00 ± 15.51 | 31.99 ± 18.65 | 32.92 ± 18.37 | 0.156 |
| **Anxiety, mean±SD** | 7.88 ± 4.80 | 5.90 ± 4.55 | 6.16 ± 4.62 | 0.110 |
| **Depression, mean±SD** | 6.44 ± 4.52 | 5.42 ± 4.21 | 5.55 ± 4.24 | 0.373 |
| **Psychological Distress, mean±SD** | 14.31 ± 8.14 | 11.31 ± 8.13 | 11.71 ± 8.16 | 0.172 |
| **Received Intervention** |  |  |  |  |
| **Yes** | 11 (68.8) | 49 (46.7) | 60 (49.6) | 0.084 |
| **No** | 5 (31.3) | 56 (53.3) | 61 (50.4) |  |

**Table 2: Information on PWDs and Caregiving**

|  | Drop Out (n=16) | Remain in Study (n=105) | Total  (n=121) | *p* value |
| --- | --- | --- | --- | --- |
|  | n (%) | n (%) | n (%) |
| **PWD’s Gender (%)** |  |  |  | 0.374 |
| Male | 7 (43.8) | 38 (36.2) | 45 (37.2) |
| Female | 9 (56.3) | 67 (63.8) | 76 (62.8) |
| **PWD’s Age (years)** | 77.13 ± 11.68 | 74.88 ± 9.81 | 75.17 ± 10.05 | 0.407 |
| **Relationship with PWDs (%)** |  |  |  |  |
| Spouse | 2 (12.5) | 31 (29.5) | 33 (27.3) | 0.078 |
| Children | 14 (87.5) | 62 (59.0) | 76 (62.8) |
| Others (Sibling, In-Law, Grandchildren) | 0 (0.0) | 12 (11.4) | 12 (9.9) |
| **Relationship with PWDs(%)*** |  |  |  |  |
| Children | 14 (87.5) | 62 (59.0) | 76 (62.8) | 0.023 |
| Non-children | 2 (12.5) | 43 (41.0) | 45 (37.2) |  |
| **Duration of care, (months) Mean±SD** | 41.31 ± 31.74 | 48.92 ± 44.29 | 47.92 ± 42.81 | 0.510 |
| **Hours of care per day** | 17.63 ± 6.86 | 18.73 ± 7.01 | 18.59 ± 6.97 | 0.556 |
| **PWD’s ability to self-care** |  |  |  |  |
| Yes | 4 (25.0) | 64 (61.0) | 68 (56.2) | 0.007 |
| No | 12 (75.0) | 41 (39.0) | 53 (43.8) |
| **Shared Care (%)** |  |  |  |  |
| Yes | 7 (43.8) | 66 (62.9) | 73 (60.3) | 0.119 |
| No | 9 (56.3) | 39 (37.1) | 48 (39.7) |
| **Number of family member as caregiver, Mean±SD** | 1.00 ± 1.41 | 1.38 ± 1.53 | 1.33 ± 1.52 | 0.352 |
